# Supplementary figures and images for: Paracrine Secreted Frizzled-Related Protein 4 Inhibits Melanocytes Differentiation in Hair Follicle
Source: Hindawi journal article supplement (doi:10.1155/2017/2857478), 2017-01-01

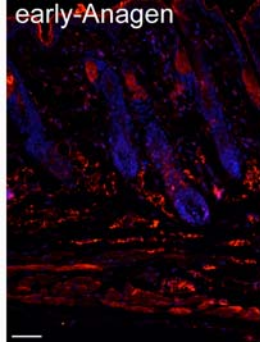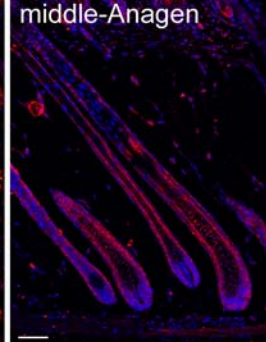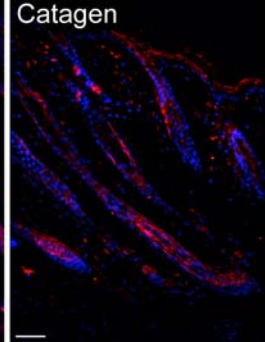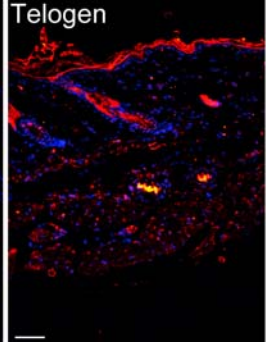

DAPI

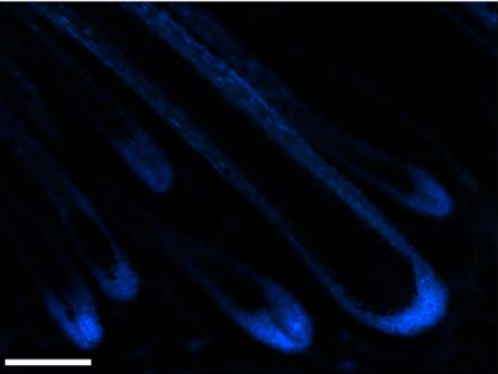

CY3

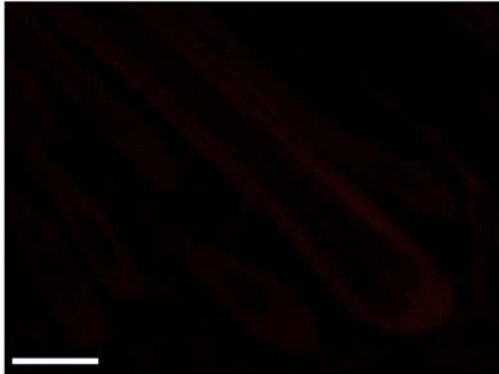

Merged

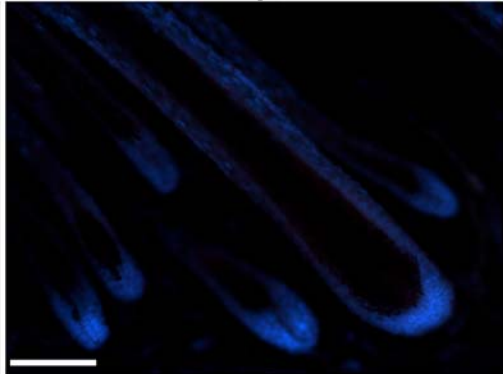

d7

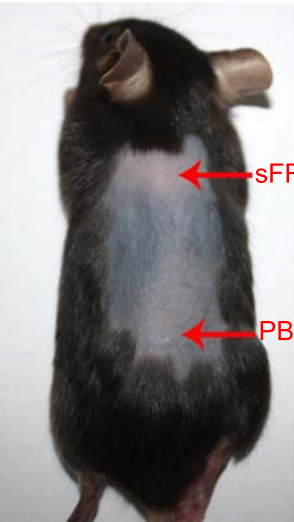

d10

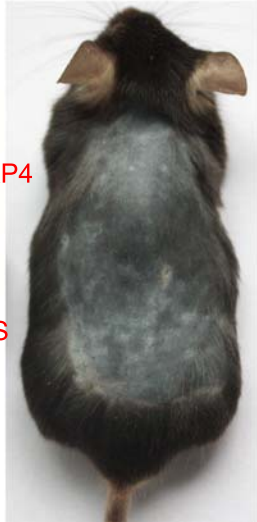

d13

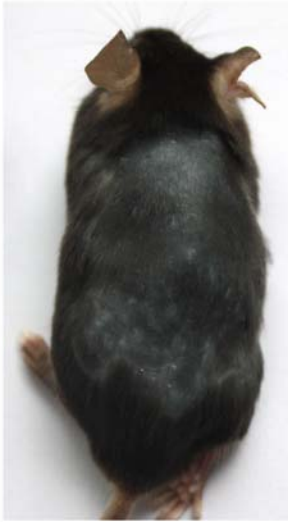

d16

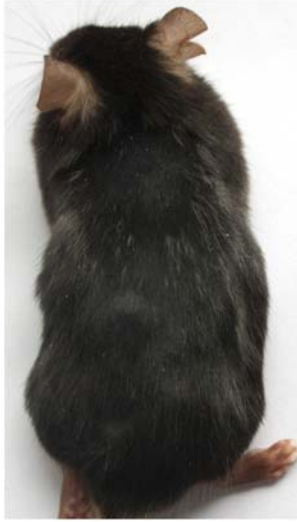

d30

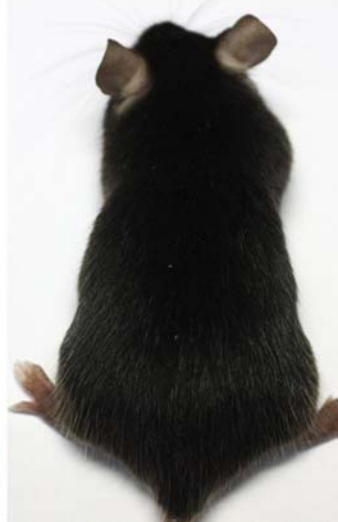

4d-PBS

4d-sFRP4

(a) AE13

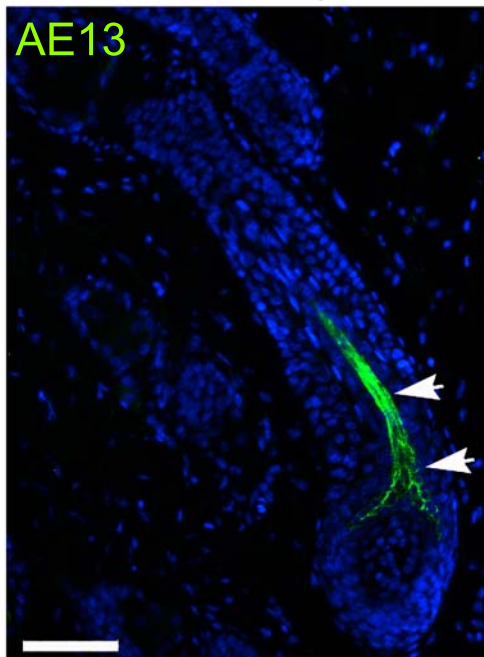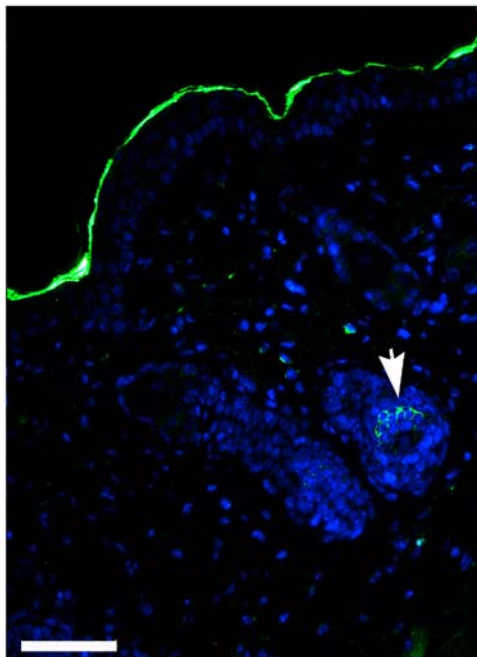

(b) AE15

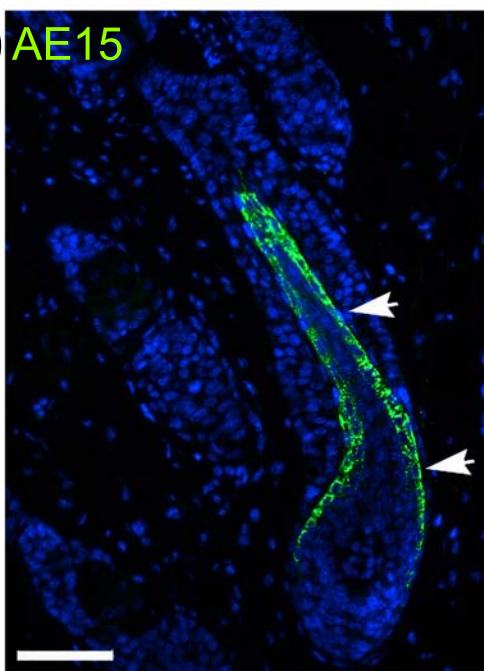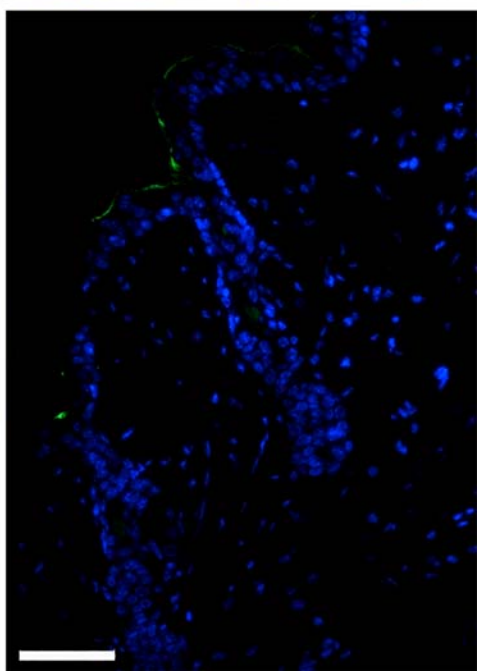

PBS

sFRP4

2d

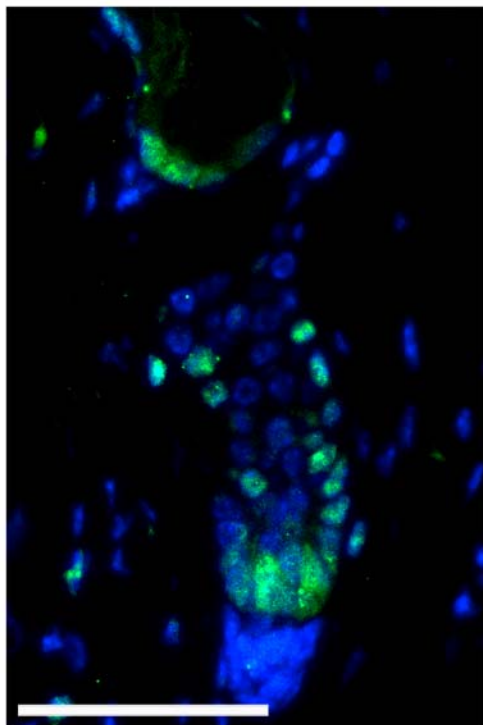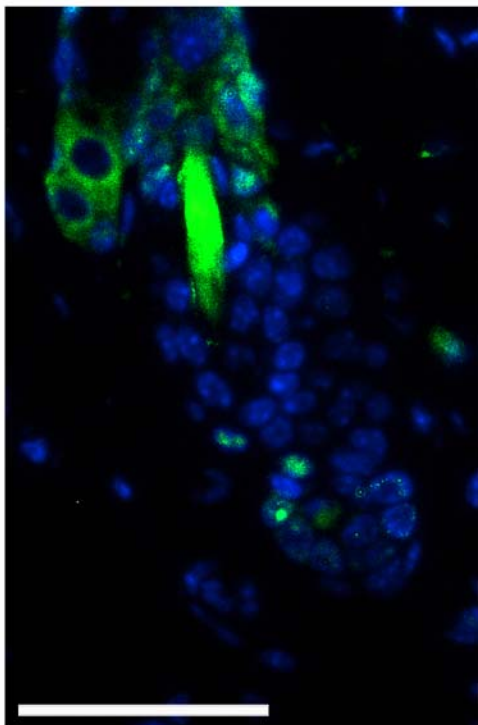

4d

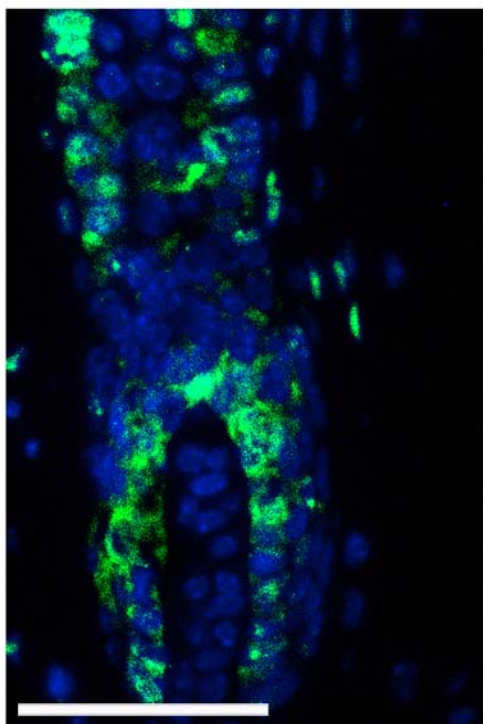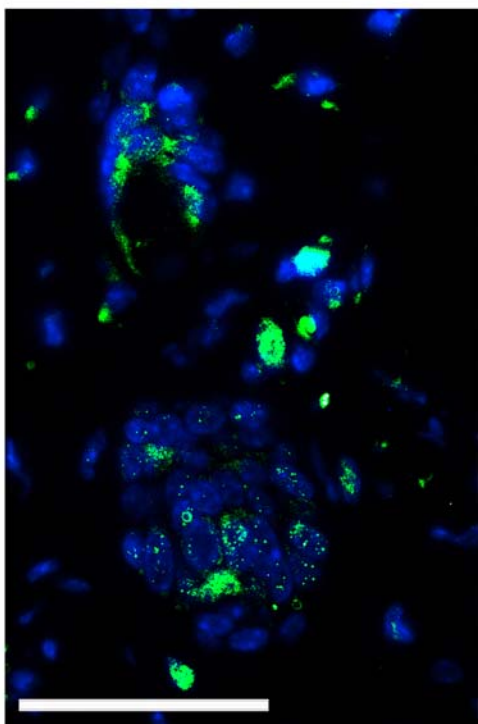

Supplement: f1 [file 2857478.f1.zip]
